# Supplementary material for: In-solution Y-chromosome capture-enrichment on ancient DNA libraries
Source: PubMed Central journal article supplement (PMC6092841; doi:10.1186/s12864-018-4945-x), 2018-08-14

**STM1**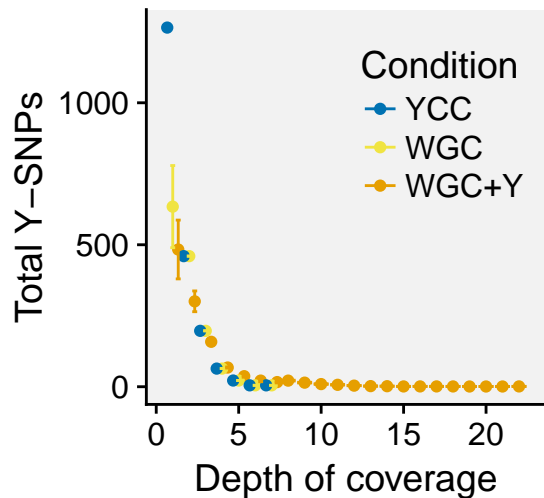**STM2**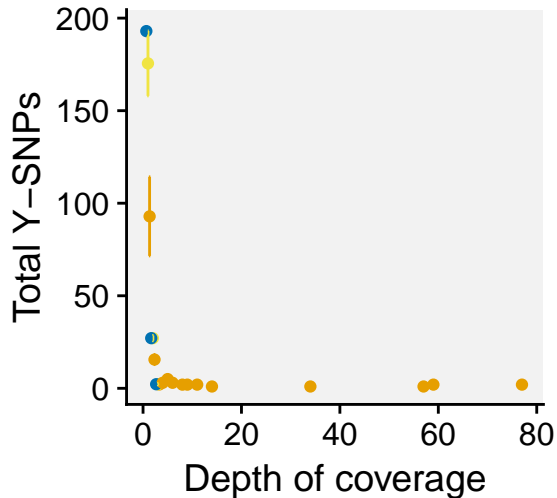**PI174**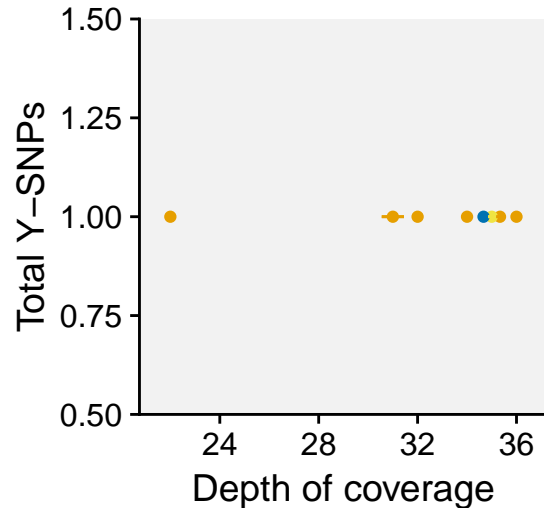**PI383**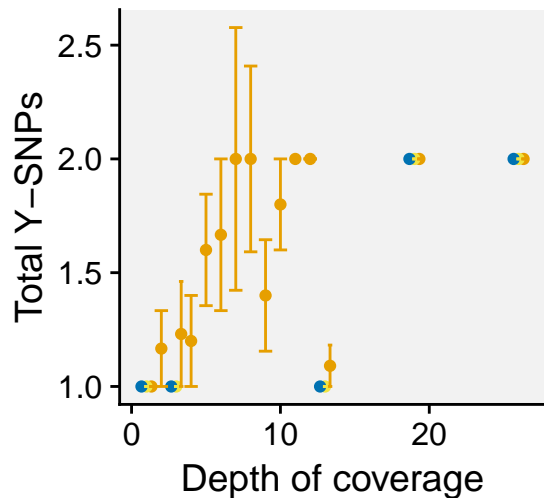**PI435**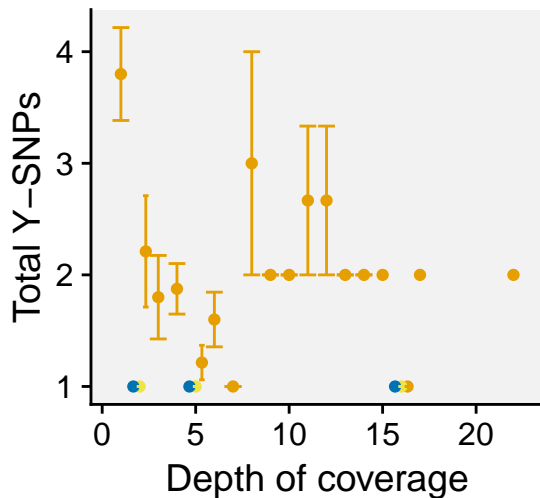**PI437**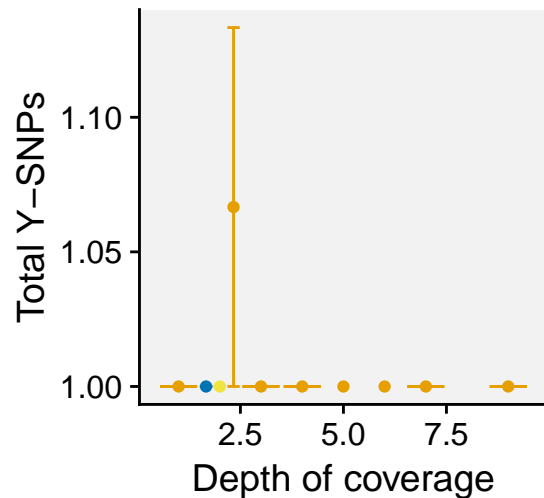

Supplement: 12864_2018_4945_MOESM6_ESM.pdf [file 12864_2018_4945_MOESM6_ESM.pdf]
