# Supplementary material for: In-solution Y-chromosome capture-enrichment on ancient DNA libraries
Source: BMC Genomics. 2018 Aug 14;19:608. doi: 10.1186/s12864-018-4945-x (PMC6092841; doi:10.1186/s12864-018-4945-x)
Supplement: Supplementary file 1 — On-target regions. (BED 90 kb) [file 12864_2018_4945_MOESM1_ESM.bed]

chrY	2654873	2663772
chrY	2663873	2664940
chrY	2665058	2665737
chrY	2665818	2666547
chrY	2666703	2667298
chrY	2667378	2667965
chrY	2668048	2668898
chrY	2669038	2669885
chrY	2670108	2670383
chrY	2670783	2671147
chrY	2671708	2671983
chrY	2672453	2672723
chrY	2673298	2673570
chrY	2680428	2680799
chrY	2680873	2681145
chrY	2681223	2682230
chrY	2682273	2682683
chrY	2682743	2683015
chrY	2683363	2683974
chrY	2684233	2684580
chrY	2684638	2685605
chrY	2685823	2686406
chrY	2686533	2686947
chrY	2687023	2687881
chrY	2687993	2688586
chrY	2688848	2689624
chrY	2689753	2690706
chrY	2690853	2691732
chrY	2691843	2693304
chrY	2693388	2695520
chrY	2695588	2696418
chrY	2696653	2698030
chrY	2699603	2701298
chrY	2701388	2704240
chrY	2704268	2706649
chrY	2706753	2707022
chrY	2707043	2708069
chrY	2708083	2708688
chrY	2708828	2718985
chrY	2719083	2721980
chrY	2722058	2724288
chrY	2724363	2724693
chrY	2724758	2725520
chrY	2725643	2729734
chrY	2730143	2734010
chrY	2734093	2736658
chrY	2736723	2738372
chrY	2738443	2738854
chrY	2738993	2740142
chrY	2740743	2741201
chrY	2741273	2745650
chrY	2746083	2746736
chrY	2746833	2748393
chrY	2748438	2750664
chrY	2750758	2752337
chrY	2752638	2752977
chrY	2753148	2758122
chrY	2758868	2759459
chrY	2759568	2759839
chrY	2759918	2762044
chrY	2762123	2763592
chrY	2763703	2766763
chrY	2766898	2768687
chrY	2768723	2768992
chrY	2769143	2769966
chrY	2769983	2770447
chrY	2770558	2771578
chrY	2771773	2772039
chrY	2773133	2773408
chrY	2773978	2774723
chrY	2775433	2776284
chrY	2776393	2783472
chrY	2783548	2784304
chrY	2784333	2785116
chrY	2785233	2785914
chrY	2787403	2788216
chrY	2789558	2789834
chrY	2790118	2790393
chrY	2793048	2793700
chrY	2793793	2795645
chrY	2795718	2797192
chrY	2797298	2798483
chrY	2798988	2799461
chrY	2799593	2805368
chrY	2805453	2806136
chrY	2806238	2806720
chrY	2806793	2809636
chrY	2809733	2810068
chrY	2810678	2811422
chrY	2811523	2812881
chrY	2812973	2813613
chrY	2813703	2814805
chrY	2814973	2816989
chrY	2817338	2817715
chrY	2817843	2818148
chrY	2818168	2820061
chrY	2820158	2821212
chrY	2821288	2825309
chrY	2825393	2833278
chrY	2833383	2835714
chrY	2835798	2836450
chrY	2836538	2839912
chrY	2840018	2841208
chrY	2841278	2842313
chrY	2842453	2842787
chrY	2842903	2843804
chrY	2843983	2844254
chrY	2844368	2845041
chrY	2845149	2845659
chrY	2845759	2850956
chrY	2851009	2852424
chrY	2852824	2853225
chrY	2853654	2854852
chrY	2854984	2855413
chrY	2855504	2856752
chrY	2857249	2857525
chrY	2857774	2858036
chrY	2858064	2858376
chrY	2858664	2859057
chrY	2859169	2859524
chrY	2859619	2860061
chrY	2860189	2861353
chrY	2861449	2862489
chrY	2862524	2865539
chrY	2865669	2865982
chrY	2866829	2868926
chrY	2869074	2881537
chrY	2881589	2882564
chrY	2882634	2884020
chrY	2884984	2885390
chrY	2885464	2885735
chrY	2885839	2888681
chrY	2888799	2892589
chrY	2892729	2893000
chrY	2893109	2894986
chrY	2900899	2903310
chrY	2903444	2905939
chrY	2906034	2908060
chrY	2908149	2909651
chrY	2909734	2913136
chrY	6619024	6619442
chrY	6619444	6621540
chrY	6621944	6622220
chrY	6623234	6623529
chrY	6624744	6625020
chrY	6626034	6626531
chrY	6626694	6630332
chrY	6630719	6631273
chrY	6631679	6634067
chrY	6634279	6634684
chrY	6634804	6637105
chrY	6642559	6644678
chrY	6644784	6645923
chrY	6645974	6654213
chrY	6654264	6658606
chrY	6658684	6663214
chrY	6664649	6665516
chrY	6665604	6666131
chrY	6666179	6667336
chrY	6667429	6672430
chrY	6672634	6674550
chrY	6674629	6675035
chrY	6675159	6682004
chrY	6682034	6682410
chrY	6682459	6682765
chrY	6682869	6683144
chrY	6685359	6685672
chrY	6687729	6688074
chrY	6688604	6690322
chrY	6690484	6690907
chrY	6691299	6692560
chrY	6692939	6693431
chrY	6693524	6694486
chrY	6694519	6698922
chrY	6699059	6699467
chrY	6699529	6700773
chrY	6700859	6705343
chrY	6705454	6708956
chrY	6710994	6711649
chrY	6711794	6712094
chrY	6712224	6712498
chrY	6713539	6713822
chrY	6713999	6720355
chrY	6727589	6728237
chrY	6728279	6730137
chrY	6730189	6730458
chrY	6730689	6734787
chrY	6734874	6739819
chrY	6739929	6747034
chrY	6748124	6748610
chrY	6751414	6752190
chrY	6752394	6753320
chrY	6753404	6754586
chrY	6754629	6755806
chrY	6755969	6756652
chrY	6757169	6757651
chrY	6757729	6763732
chrY	6764059	6765665
chrY	6766129	6767595
chrY	6767899	6768976
chrY	6769064	6770703
chrY	6771029	6773570
chrY	6773824	6774342
chrY	6774409	6774908
chrY	6774924	6775243
chrY	6775329	6775948
chrY	6776414	6780689
chrY	6780789	6782523
chrY	6782649	6784501
chrY	6784689	6786594
chrY	6786624	6787018
chrY	6787159	6791279
chrY	6791299	6791640
chrY	6791739	6792450
chrY	6792559	6793423
chrY	6793684	6794737
chrY	6795454	6798643
chrY	6798704	6798975
chrY	6799344	6800617
chrY	6800704	6801046
chrY	6801129	6805452
chrY	6805524	6806803
chrY	6807294	6807796
chrY	6808204	6809410
chrY	6809484	6810027
chrY	6810039	6814466
chrY	6814749	6816533
chrY	6816624	6818882
chrY	6821924	6822221
chrY	6822554	6826582
chrY	6827529	6828394
chrY	6828499	6829874
chrY	6830294	6834202
chrY	6834279	6835529
chrY	6835684	6838432
chrY	6838544	6839718
chrY	6839834	6844030
chrY	6844164	6847059
chrY	6847159	6847781
chrY	6847914	6854410
chrY	6854434	6855442
chrY	6855544	6856544
chrY	6856639	6857117
chrY	6857154	6858684
chrY	6858789	6863730
chrY	6863734	6864557
chrY	6864659	6865280
chrY	6865369	6866549
chrY	6866554	6868772
chrY	6868814	6869475
chrY	6869579	6873330
chrY	6873379	6874440
chrY	6874799	6875583
chrY	6875679	6877893
chrY	6877984	6878784
chrY	6878884	6885197
chrY	6885224	6888431
chrY	6888544	6892085
chrY	6892684	6895094
chrY	6895134	6895542
chrY	6895709	6900211
chrY	6900249	6900943
chrY	6903839	6910529
chrY	6910609	6912763
chrY	6912854	6915857
chrY	6915984	6917022
chrY	6917864	6918352
chrY	6918514	6919348
chrY	6919439	6920766
chrY	6920894	6922791
chrY	6922884	6927338
chrY	6927364	6933281
chrY	6933379	6934498
chrY	6934709	6935327
chrY	6935394	6936165
chrY	6936289	6940013
chrY	6940114	6944066
chrY	6944124	6944754
chrY	6944884	6946031
chrY	6946124	6948150
chrY	6948569	6949361
chrY	6949414	6952433
chrY	6952539	6953201
chrY	6953379	6954749
chrY	6955179	6957676
chrY	6957714	6959833
chrY	6959944	6967777
chrY	6967849	6971733
chrY	6971799	6972507
chrY	6972594	6976156
chrY	6976194	6979654
chrY	6979759	6981125
chrY	6981434	6983904
chrY	6983949	6984457
chrY	6984904	6988344
chrY	6988409	6992337
chrY	6992739	6995117
chrY	6995154	6996799
chrY	6996924	6997322
chrY	6997394	6998106
chrY	7000064	7000340
chrY	7008334	7009293
chrY	7009359	7010117
chrY	7010189	7011331
chrY	7011479	7012369
chrY	7012429	7014620
chrY	7015099	7015428
chrY	7015509	7015974
chrY	7033879	7047999
chrY	7048334	7048618
chrY	7048749	7052882
chrY	7052969	7053314
chrY	7053319	7053626
chrY	7053709	7058125
chrY	7058844	7059118
chrY	7063124	7063397
chrY	7064034	7073425
chrY	7073454	7073761
chrY	7073824	7074514
chrY	7074569	7074982
chrY	7075069	7076191
chrY	7076679	7078413
chrY	7078484	7079212
chrY	7079284	7079585
chrY	7079654	7080202
chrY	7080299	7080634
chrY	7080974	7081441
chrY	7081594	7082707
chrY	7082784	7083689
chrY	7083964	7084345
chrY	7084624	7085692
chrY	7086089	7087892
chrY	7088039	7089143
chrY	7089159	7090637
chrY	7090699	7091246
chrY	7091269	7092267
chrY	7092529	7093090
chrY	7093164	7094352
chrY	7094434	7094727
chrY	7095314	7096306
chrY	7096349	7097340
chrY	7097439	7098684
chrY	7098859	7099131
chrY	7099344	7101053
chrY	7101159	7101496
chrY	7101559	7102028
chrY	7102154	7102486
chrY	7102694	7104070
chrY	7104474	7104855
chrY	7105254	7106475
chrY	7106564	7107087
chrY	7107734	7108152
chrY	7108219	7108969
chrY	7109179	7109564
chrY	7109594	7111399
chrY	7111589	7112397
chrY	7112559	7113169
chrY	7113229	7113669
chrY	7113739	7114114
chrY	7126879	7127836
chrY	7128169	7129796
chrY	7129884	7132169
chrY	7133014	7133911
chrY	7133959	7134233
chrY	7134329	7134712
chrY	7134804	7135152
chrY	7135579	7136948
chrY	7137469	7138400
chrY	7138434	7138836
chrY	7139314	7139713
chrY	7139804	7140136
chrY	7143869	7145008
chrY	7145079	7146103
chrY	7146219	7146877
chrY	7146964	7148108
chrY	7148204	7149420
chrY	7149799	7150284
chrY	7150804	7152973
chrY	7153079	7153806
chrY	7153984	7154618
chrY	7154719	7156484
chrY	7156559	7157187
chrY	7157414	7158045
chrY	7158174	7159156
chrY	7159239	7160276
chrY	7160349	7160690
chrY	7161054	7161595
chrY	7161699	7162177
chrY	7162259	7163096
chrY	7163214	7164070
chrY	7164589	7165387
chrY	7165499	7166677
chrY	7166684	7167555
chrY	7167584	7169745
chrY	7170109	7170773
chrY	7170799	7174175
chrY	7174304	7174573
chrY	7175719	7176048
chrY	7176064	7179834
chrY	7179919	7180187
chrY	7180279	7182878
chrY	7183224	7183947
chrY	7184029	7185129
chrY	7185224	7186005
chrY	7186109	7186489
chrY	7186759	7187688
chrY	7187764	7189967
chrY	7190064	7190685
chrY	7190739	7195092
chrY	7195134	7195693
chrY	7195729	7196138
chrY	7196239	7196511
chrY	7196574	7197158
chrY	7197564	7199451
chrY	7199539	7199986
chrY	7200074	7200589
chrY	7200999	7201345
chrY	7201589	7204922
chrY	7205064	7206509
chrY	7206854	7208193
chrY	7208424	7210067
chrY	7210154	7212640
chrY	7212739	7213421
chrY	7213514	7214977
chrY	7215054	7215880
chrY	7215944	7216572
chrY	7216674	7217254
chrY	7217459	7217737
chrY	7217944	7220888
chrY	7220984	7221580
chrY	7221679	7221964
chrY	7222094	7223000
chrY	7223114	7223380
chrY	7223604	7225684
chrY	7225769	7226936
chrY	7226994	7228326
chrY	7228399	7231432
chrY	7231639	7232950
chrY	7233214	7233666
chrY	7233739	7234018
chrY	7234179	7236436
chrY	7236704	7237086
chrY	7237174	7237730
chrY	7237994	7238367
chrY	7238419	7239041
chrY	7239119	7239397
chrY	7239484	7241647
chrY	7241744	7242015
chrY	7242094	7242539
chrY	7242619	7243066
chrY	7243414	7244576
chrY	7244654	7246022
chrY	7246089	7247525
chrY	7247604	7252184
chrY	7252289	7253210
chrY	7253314	7255374
chrY	7255399	7257523
chrY	7257709	7258011
chrY	7258049	7258563
chrY	7258679	7263798
chrY	7264854	7269699
chrY	7269799	7270378
chrY	7270489	7272161
chrY	7272214	7274908
chrY	7274954	7275442
chrY	7277569	7281037
chrY	7281129	7282245
chrY	7282354	7284127
chrY	7284244	7285174
chrY	7285244	7287796
chrY	7288304	7289340
chrY	7289429	7294567
chrY	7294789	7295785
chrY	7296199	7296649
chrY	7301724	7303115
chrY	7303559	7304433
chrY	7304579	7305052
chrY	7305184	7305631
chrY	7305754	7306655
chrY	7306809	7307537
chrY	7307669	7309562
chrY	7309709	7310366
chrY	7310484	7311074
chrY	7311144	7311446
chrY	7311559	7313194
chrY	7313704	7314601
chrY	7314699	7315634
chrY	7315749	7316638
chrY	7316739	7318589
chrY	7318704	7320113
chrY	7320204	7320927
chrY	7321144	7327993
chrY	7328069	7332601
chrY	7332704	7335577
chrY	7335629	7338080
chrY	7338124	7340295
chrY	7340359	7341067
chrY	7341214	7342287
chrY	7345364	7345637
chrY	7347124	7347399
chrY	7347549	7347827
chrY	7347839	7348495
chrY	7349269	7349803
chrY	7349889	7354656
chrY	7354739	7358059
chrY	7358139	7359563
chrY	7359979	7360419
chrY	7360559	7361294
chrY	7361359	7362072
chrY	7362284	7362557
chrY	7362574	7363156
chrY	7363224	7367219
chrY	7367519	7368924
chrY	7368929	7369627
chrY	7369684	7372890
chrY	7372959	7373299
chrY	7373439	7374216
chrY	7374219	7374831
chrY	7374849	7375352
chrY	7375454	7376500
chrY	7376564	7377377
chrY	7377489	7378401
chrY	7379269	7379541
chrY	7380274	7381007
chrY	7381159	7381427
chrY	7381799	7382427
chrY	7382559	7383733
chrY	7383789	7385827
chrY	7385909	7387764
chrY	7387854	7390147
chrY	7390259	7390690
chrY	7390704	7391793
chrY	7391844	7392908
chrY	7395309	7401067
chrY	7401159	7409349
chrY	7409419	7409722
chrY	7409819	7414118
chrY	7414204	7416496
chrY	7416774	7417898
chrY	7417994	7420474
chrY	7420624	7424738
chrY	7424914	7431048
chrY	7518874	7520872
chrY	7520949	7524601
chrY	7524824	7529526
chrY	7529629	7534628
chrY	7534714	7535824
chrY	7536559	7537603
chrY	7537994	7538737
chrY	7538809	7541619
chrY	7541649	7542221
chrY	7542509	7564113
chrY	7564379	7568841
chrY	7568844	7572948
chrY	7578129	7578581
chrY	7579169	7581936
chrY	7582039	7583347
chrY	7583469	7613941
chrY	7614064	7617662
chrY	7617724	7623545
chrY	7623694	7626271
chrY	7626359	7627773
chrY	7627849	7630111
chrY	7630229	7630502
chrY	7630719	7630988
chrY	7633284	7635771
chrY	7635914	7640952
chrY	7641084	7642981
chrY	7643049	7645221
chrY	7645464	7646406
chrY	7646489	7648955
chrY	7649009	7649276
chrY	7649344	7650189
chrY	7650239	7650662
chrY	7650744	7651400
chrY	7651474	7652243
chrY	7652339	7664530
chrY	7664634	7670294
chrY	7670384	7681744
chrY	7681854	7695802
chrY	7695884	7699103
chrY	7699144	7699421
chrY	7699449	7709363
chrY	7710814	7711089
chrY	7712214	7712484
chrY	7713434	7714021
chrY	7714119	7715239
chrY	7715284	7717665
chrY	7717979	7721160
chrY	7721279	7723640
chrY	7724099	7725826
chrY	7725829	7730383
chrY	7730614	7750678
chrY	7750774	7759146
chrY	7759174	7761056
chrY	7761334	7774151
chrY	7775024	7777097
chrY	7777159	7782859
chrY	7782979	7784483
chrY	7784604	7829173
chrY	7829189	7832178
chrY	7832444	7860585
chrY	7860899	7865934
chrY	7866139	7866570
chrY	7866704	7867971
chrY	7868159	7871376
chrY	7871474	7873689
chrY	7873999	7880418
chrY	7880504	7885354
chrY	7886394	7894668
chrY	7898829	7916997
chrY	7917059	7917337
chrY	7917899	7918172
chrY	7918474	7921795
chrY	7921984	7923627
chrY	7925279	7925933
chrY	7926059	7935686
chrY	7935779	7938769
chrY	7938904	7939276
chrY	7939464	7941713
chrY	7941774	7947159
chrY	7947199	7947979
chrY	7947989	7958533
chrY	7958534	7964598
chrY	7967064	7967361
chrY	7969309	7969578
chrY	7969674	7969982
chrY	7970449	7979543
chrY	7979609	7984479
chrY	7986009	7990129
chrY	7990149	7996269
chrY	7996429	8001377
chrY	8001414	8001938
chrY	8002079	8002422
chrY	8008264	8013385
chrY	8013469	8014923
chrY	8015044	8015927
chrY	8015954	8016543
chrY	8016609	8016982
chrY	8017129	8022736
chrY	8022864	8024956
chrY	8025089	8026692
chrY	8026714	8027762
chrY	8027854	8035999
chrY	8036099	8040124
chrY	8040209	8043369
chrY	8044649	8053412
chrY	8053509	8055880
chrY	8056014	8056444
chrY	8056714	8056984
chrY	8057304	8057642
chrY	8058034	8058314
chrY	8058634	8061834
chrY	8067519	8070055
chrY	8070144	8072454
chrY	8072644	8072943
chrY	8072959	8073236
chrY	8073424	8073838
chrY	8073854	8074888
chrY	8074899	8080110
chrY	8080189	8080459
chrY	8080524	8084294
chrY	8084434	8085262
chrY	8085709	8090728
chrY	8090749	8091017
chrY	8092239	8092643
chrY	8092699	8093300
chrY	8093464	8094444
chrY	8094834	8095324
chrY	8095599	8100392
chrY	8100574	8109837
chrY	8109984	8110601
chrY	8112609	8119157
chrY	8119329	8124557
chrY	8124669	8124945
chrY	8125064	8127917
chrY	8128029	8129073
chrY	8129284	8130514
chrY	8130719	8131446
chrY	8131499	8135424
chrY	8138174	8140431
chrY	8140584	8141468
chrY	8141474	8142795
chrY	8142859	8143537
chrY	8143629	8153601
chrY	8154144	8162019
chrY	8162064	8163814
chrY	8163829	8164943
chrY	8165029	8166605
chrY	8166849	8167123
chrY	8168029	8169339
chrY	8169454	8170426
chrY	8170484	8172787
chrY	8172899	8173833
chrY	8178909	8181258
chrY	8181384	8201985
chrY	8202034	8207935
chrY	8207964	8213489
chrY	8214449	8214966
chrY	8215049	8216495
chrY	8216594	8218102
chrY	8218344	8221338
chrY	8221379	8230202
chrY	8230244	8235327
chrY	8237454	8253744
chrY	8253819	8255916
chrY	8255989	8261009
chrY	8261104	8276067
chrY	8278174	8278450
chrY	8279714	8279989
chrY	8279999	8281609
chrY	8281709	8283852
chrY	8283924	8288656
chrY	8288759	8291015
chrY	8291069	8293057
chrY	8293894	8295401
chrY	8295774	8296222
chrY	8296674	8314238
chrY	8314339	8321539
chrY	8325694	8326046
chrY	8326504	8333574
chrY	8333644	8341703
chrY	8341814	8343020
chrY	8343294	8344071
chrY	8345934	8369485
chrY	8371894	8376164
chrY	8376324	8379178
chrY	8379624	8385970
chrY	8386179	8389665
chrY	8389754	8408394
chrY	8409344	8479499
chrY	8479589	8481118
chrY	8481399	8501632
chrY	8501694	8525279
chrY	8525449	8556079
chrY	8556339	8649797
chrY	8650134	8652851
chrY	8652894	8654104
chrY	8654174	8655201
chrY	8655254	8655524
chrY	8655579	8658950
chrY	8659029	8663486
chrY	8663619	8665728
chrY	8665794	8669581
chrY	8669749	8671159
chrY	8671289	8690305
chrY	8690404	8692414
chrY	8692539	8694304
chrY	8694349	8695918
chrY	8696009	8699066
chrY	8699139	8704110
chrY	8704199	8705799
chrY	8705889	8712323
chrY	8713204	8715071
chrY	8715224	8719960
chrY	8720114	8723551
chrY	8723654	8724170
chrY	8724804	8728152
chrY	8728239	8732120
chrY	8732169	8735359
chrY	8735444	8736077
chrY	8736084	8739653
chrY	8741919	8746808
chrY	8746899	8748320
chrY	8748474	8748992
chrY	8749104	8760579
chrY	8760709	8761362
chrY	8761399	8761676
chrY	8761684	8761978
chrY	8762234	8766207
chrY	8766429	8768409
chrY	8768564	8774472
chrY	8774659	8776648
chrY	8776724	8778915
chrY	8779019	8785036
chrY	8785219	8785515
chrY	8786914	8787400
chrY	8787424	8787722
chrY	8787789	8788807
chrY	8788919	8790098
chrY	8790204	8792104
chrY	8792114	8792865
chrY	8793194	8793475
chrY	8793499	8799837
chrY	8799894	8806920
chrY	8807334	8807606
chrY	8807734	8811141
chrY	8815744	8816026
chrY	8817009	8822384
chrY	8822489	8824160
chrY	8827314	8831098
chrY	8831249	8832106
chrY	8832179	8835341
chrY	8835374	8840465
chrY	8840579	8842300
chrY	8842329	8843633
chrY	8843719	8848128
chrY	8848239	8856993
chrY	8857029	8878807
chrY	8878844	8879498
chrY	8879629	8900999
chrY	8901364	8902094
chrY	8902169	8905125
chrY	8975885	8977011
chrY	8977110	8981115
chrY	8981195	8981878
chrY	8981970	8983011
chrY	8983020	8983499
chrY	8983545	8985866
chrY	8985935	8986468
chrY	8986625	8992907
chrY	8992910	8993907
chrY	8994015	8997197
chrY	8997270	9013085
chrY	9013170	9020539
chrY	9020600	9025011
chrY	9025350	9028301
chrY	9028395	9028916
chrY	9028950	9029752
chrY	9029845	9030117
chrY	9030405	9032071
chrY	9034560	9038215
chrY	9038375	9040167
chrY	9040195	9040718
chrY	9041050	9043981
chrY	9044110	9046908
chrY	9047140	9047412
chrY	9047415	9047701
chrY	9047735	9048072
chrY	9048165	9063146
chrY	9063810	9069005
chrY	9069100	9069679
chrY	9069690	9069962
chrY	9070115	9074042
chrY	9074245	9075288
chrY	9075365	9078612
chrY	9078665	9088728
chrY	9089085	9091585
chrY	9091680	9092594
chrY	9092655	9093352
chrY	9093440	9094303
chrY	9094635	9116658
chrY	9116935	9139858
chrY	9140015	9140284
chrY	9140310	9146434
chrY	9147040	9147322
chrY	9147675	9151081
chrY	9151205	9151484
chrY	9151650	9152585
chrY	9152750	9153029
chrY	9153310	9153592
chrY	9153960	9154242
chrY	9154355	9154624
chrY	9154840	9155622
chrY	9392877	9397773
chrY	9398327	9398912
chrY	9399232	9400748
chrY	9400857	9401722
chrY	9401842	9402567
chrY	9403207	9408439
chrY	9410902	9411176
chrY	9411252	9411562
chrY	9414657	9416794
chrY	9416882	9418970
chrY	9419027	9422952
chrY	9423087	9424444
chrY	9424512	9426016
chrY	9426082	9427412
chrY	9434447	9438193
chrY	9438312	9440502
chrY	9440667	9441146
chrY	9441462	9442047
chrY	9442127	9444514
chrY	9444617	9444886
chrY	9444977	9446004
chrY	9446082	9446356
chrY	9446392	9447134
chrY	9447182	9451336
chrY	9451657	9453800
chrY	9453957	9456104
chrY	9456182	9456554
chrY	9456652	9457205
chrY	9457282	9459428
chrY	9459462	9461122
chrY	13884878	13885942
chrY	13886033	13886879
chrY	13886973	13887495
chrY	13887613	13890132
chrY	13890213	13891756
chrY	13891848	13894908
chrY	13894988	13897176
chrY	13897268	13898300
chrY	13898453	13898856
chrY	13898973	13900013
chrY	13900118	13903521
chrY	13903638	13905163
chrY	13905278	13909104
chrY	13909218	13911615
chrY	13911628	13913128
chrY	13913218	13913842
chrY	13914273	13915026
chrY	13915293	13915552
chrY	13915943	13919028
chrY	13919118	13920948
chrY	13921028	13922969
chrY	13923073	13923337
chrY	13923498	13924814
chrY	13924933	13926231
chrY	13926408	13927187
chrY	13927298	13928642
chrY	13928693	13929996
chrY	13930103	13930726
chrY	13930818	13931829
chrY	13931943	13933547
chrY	13933623	13936073
chrY	13936198	13938612
chrY	13938843	13939995
chrY	13940093	13940678
chrY	13940823	13941788
chrY	13941868	13943879
chrY	13943963	13945403
chrY	13945498	13947488
chrY	13947573	13948420
chrY	13948503	13949076
chrY	13949138	13950395
chrY	13950493	13951039
chrY	13951138	13951581
chrY	13951603	13952133
chrY	13952198	13953722
chrY	13953843	13956024
chrY	13956038	13957288
chrY	13957398	13957942
chrY	13958028	13958369
chrY	13958568	13959556
chrY	13959738	13960836
chrY	13960938	13962117
chrY	13962238	13963920
chrY	13964057	13965089
chrY	13965182	13967348
chrY	13967397	13967755
chrY	13967767	13968240
chrY	13968452	13968949
chrY	13969097	13969742
chrY	13969862	13970134
chrY	13970472	13970747
chrY	13972682	13974777
chrY	13974882	13976131
chrY	13983897	13984167
chrY	13984362	13985013
chrY	13985147	13985457
chrY	13987372	13992097
chrY	13992117	13996198
chrY	13996247	13997855
chrY	13998252	13999981
chrY	14000052	14005742
chrY	14005892	14008783
chrY	14008862	14009529
chrY	14009532	14016632
chrY	14016652	14017129
chrY	14017322	14019362
chrY	14020247	14021837
chrY	14021952	14025377
chrY	14025997	14029884
chrY	14029952	14030330
chrY	14030427	14030757
chrY	14030832	14031762
chrY	14031992	14034178
chrY	14034262	14037936
chrY	14038082	14041057
chrY	14041127	14042800
chrY	14042897	14045498
chrY	14045652	14047699
chrY	14047807	14048328
chrY	14048432	14048881
chrY	14048997	14049930
chrY	14050252	14050759
chrY	14050832	14052755
chrY	14052862	14053926
chrY	14054002	14054792
chrY	14054892	14055397
chrY	14058966	14059950
chrY	14060056	14061467
chrY	14061551	14062290
chrY	14062381	14062857
chrY	14063126	14064349
chrY	14064436	14066917
chrY	14066941	14067972
chrY	14068021	14068436
chrY	14068526	14071465
chrY	14071631	14073216
chrY	14073586	14076566
chrY	14076606	14079627
chrY	14079651	14087460
chrY	14087481	14087846
chrY	14088246	14097849
chrY	14097931	14098729
chrY	14098736	14100782
chrY	14101371	14104304
chrY	14104416	14105023
chrY	14105166	14109416
chrY	14115046	14118351
chrY	14123581	14123859
chrY	14124186	14124974
chrY	14125006	14128185
chrY	14135561	14135869
chrY	14135891	14142235
chrY	14142381	14143925
chrY	14144021	14146032
chrY	14146101	14147815
chrY	14147946	14149197
chrY	14149436	14150541
chrY	14150601	14152878
chrY	14157481	14158047
chrY	14158131	14159565
chrY	14159691	14160236
chrY	14162371	14162642
chrY	14168336	14174638
chrY	14174756	14175037
chrY	14175066	14176230
chrY	14176516	14177872
chrY	14177971	14178278
chrY	14179766	14180041
chrY	14180101	14180408
chrY	14181626	14181901
chrY	14183536	14184275
chrY	14184671	14186096
chrY	14186106	14186897
chrY	14187031	14191381
chrY	14192076	14194308
chrY	14194371	14195039
chrY	14195296	14195802
chrY	14196236	14198721
chrY	14198876	14200824
chrY	14200841	14201838
chrY	14201931	14203256
chrY	14203346	14203829
chrY	14205066	14208999
chrY	14209011	14213128
chrY	14213766	14214879
chrY	14214996	14218364
chrY	14218481	14219523
chrY	14219676	14220017
chrY	14220081	14220949
chrY	14221026	14222711
chrY	14222811	14224054
chrY	14224416	14227538
chrY	14227641	14228608
chrY	14228636	14228908
chrY	14228926	14229855
chrY	14229946	14231930
chrY	14232046	14232392
chrY	14233181	14233446
chrY	14233596	14235891
chrY	14235961	14237948
chrY	14238051	14239128
chrY	14239141	14240305
chrY	14240336	14241230
chrY	14241361	14245008
chrY	14245236	14246613
chrY	14247551	14250002
chrY	14250266	14250542
chrY	14251846	14253041
chrY	14253161	14253715
chrY	14253791	14254521
chrY	14254526	14254976
chrY	14255481	14255816
chrY	14261646	14263401
chrY	14263466	14263760
chrY	14263851	14266968
chrY	14267246	14267686
chrY	14267716	14271178
chrY	14271196	14274774
chrY	14274891	14275407
chrY	14275501	14278317
chrY	14278331	14278609
chrY	14278916	14282491
chrY	14282636	14283124
chrY	14283221	14284533
chrY	14284651	14284939
chrY	14284961	14285585
chrY	14285661	14286179
chrY	14286271	14286884
chrY	14286941	14289094
chrY	14292796	14293605
chrY	14293711	14294053
chrY	14294141	14294935
chrY	14294941	14295267
chrY	14295346	14296329
chrY	14296376	14296702
chrY	14297006	14297305
chrY	14297376	14297752
chrY	14298126	14300134
chrY	14300231	14300501
chrY	14300596	14301704
chrY	14302166	14302441
chrY	14302566	14302841
chrY	14307586	14308155
chrY	14308271	14310416
chrY	14310421	14311947
chrY	14312171	14315489
chrY	14315571	14319412
chrY	14319641	14324337
chrY	14324466	14324992
chrY	14325111	14325559
chrY	14325616	14328759
chrY	14328846	14330807
chrY	14330966	14332559
chrY	14332596	14338963
chrY	14339111	14340752
chrY	14340811	14341253
chrY	14341996	14343101
chrY	14343211	14344214
chrY	14344376	14344878
chrY	14344971	14350250
chrY	14350341	14351411
chrY	14351441	14352344
chrY	14352486	14352824
chrY	14352951	14354356
chrY	14354696	14356514
chrY	14356606	14356979
chrY	14357061	14358079
chrY	14358251	14359752
chrY	14359896	14362790
chrY	14362796	14363230
chrY	14363321	14365711
chrY	14365786	14373813
chrY	14373886	14374397
chrY	14374481	14377585
chrY	14377876	14379272
chrY	14379546	14379908
chrY	14379981	14380256
chrY	14380381	14381621
chrY	14381991	14382527
chrY	14382541	14387389
chrY	14387531	14387891
chrY	14387921	14388541
chrY	14388631	14389006
chrY	14389121	14390470
chrY	14391611	14393335
chrY	14393406	14393919
chrY	14394021	14396242
chrY	14396661	14397451
chrY	14397866	14398782
chrY	14398831	14399406
chrY	14399496	14400206
chrY	14400291	14401882
chrY	14401931	14405678
chrY	14405751	14409098
chrY	14409146	14411575
chrY	14411666	14412248
chrY	14412376	14414727
chrY	14414806	14416691
chrY	14416751	14418964
chrY	14419051	14420868
chrY	14420981	14421391
chrY	14421396	14423735
chrY	14423811	14424939
chrY	14425116	14425389
chrY	14425411	14426375
chrY	14426406	14427200
chrY	14427326	14428216
chrY	14428286	14428665
chrY	14428771	14430116
chrY	14446876	14450385
chrY	14450476	14451198
chrY	14451236	14451511
chrY	14452456	14453528
chrY	14453631	14456326
chrY	14456826	14457182
chrY	14457296	14457593
chrY	14457651	14458374
chrY	14458476	14461411
chrY	14461541	14462394
chrY	14462771	14463364
chrY	14463631	14464268
chrY	14464771	14465247
chrY	14465551	14466818
chrY	14467676	14468409
chrY	14468481	14468782
chrY	14468896	14469752
chrY	14469841	14470566
chrY	14470571	14471398
chrY	14471496	14471776
chrY	14471816	14473079
chrY	14473551	14474396
chrY	14474446	14484466
chrY	14484546	14485222
chrY	14485446	14485934
chrY	14486021	14488225
chrY	14488316	14488586
chrY	14488681	14489686
chrY	14489851	14490562
chrY	14490671	14490944
chrY	14491051	14492851
chrY	14493016	14493323
chrY	14493731	14495261
chrY	14495281	14495556
chrY	14495646	14497473
chrY	14497561	14499346
chrY	14499441	14500056
chrY	14500126	14501347
chrY	14501836	14502529
chrY	14502616	14504642
chrY	14504706	14505179
chrY	14505851	14509323
chrY	14509411	14509851
chrY	14509986	14510439
chrY	14510516	14511109
chrY	14511226	14512252
chrY	14512556	14514162
chrY	14515611	14516822
chrY	14516876	14517176
chrY	14517401	14518102
chrY	14518211	14518937
chrY	14519031	14519547
chrY	14519651	14524940
chrY	14525311	14529064
chrY	14529221	14530549
chrY	14530966	14531454
chrY	14531541	14537850
chrY	14538086	14538655
chrY	14538716	14539440
chrY	14539586	14540494
chrY	14540581	14541791
chrY	14541901	14543846
chrY	14544071	14544374
chrY	14544566	14544934
chrY	14545016	14549058
chrY	14549236	14551495
chrY	14551606	14552424
chrY	14552656	14557074
chrY	14557211	14559129
chrY	14559151	14559498
chrY	14559636	14561179
chrY	14561251	14562283
chrY	14562361	14564422
chrY	14566211	14566484
chrY	14566686	14567049
chrY	14567216	14569100
chrY	14569126	14569402
chrY	14569921	14570726
chrY	14570951	14571227
chrY	14571381	14572073
chrY	14572101	14572479
chrY	14572526	14573213
chrY	14573461	14574537
chrY	14574556	14574827
chrY	14575071	14575344
chrY	14576041	14577908
chrY	14577966	14578473
chrY	14578576	14584607
chrY	14584681	14586021
chrY	14586111	14588133
chrY	14588176	14590475
chrY	14590536	14590864
chrY	14591026	14593066
chrY	14593111	14593548
chrY	14593631	14594639
chrY	14594716	14595410
chrY	14595486	14597730
chrY	14597821	14599847
chrY	14599886	14604684
chrY	14604756	14606356
chrY	14606431	14609110
chrY	14609221	14609628
chrY	14609736	14610293
chrY	14610446	14612337
chrY	14612406	14613537
chrY	14613661	14616119
chrY	14616131	14617172
chrY	14617266	14617643
chrY	14617761	14620026
chrY	14621111	14621483
chrY	14621581	14622056
chrY	14622121	14622746
chrY	14622796	14623530
chrY	14623606	14624248
chrY	14625396	14625675
chrY	14626151	14627111
chrY	14627226	14630424
chrY	14631416	14631713
chrY	14635061	14635333
chrY	14635871	14636246
chrY	14636356	14639169
chrY	14639261	14639591
chrY	14639626	14642771
chrY	14642866	14643740
chrY	14643801	14644931
chrY	14645126	14645495
chrY	14645581	14646201
chrY	14646346	14646909
chrY	14646926	14650781
chrY	14651001	14652243
chrY	14652331	14657554
chrY	14657671	14658137
chrY	14658506	14660247
chrY	14661846	14667685
chrY	14667776	14670203
chrY	14670236	14670849
chrY	14670881	14671271
chrY	14671776	14672519
chrY	14672766	14673284
chrY	14673811	14674300
chrY	14674401	14674865
chrY	14674931	14675260
chrY	14675336	14676166
chrY	14676266	14676882
chrY	14677176	14678002
chrY	14678146	14678425
chrY	14678541	14678808
chrY	14678951	14680351
chrY	14680396	14681619
chrY	14687516	14687899
chrY	14687921	14690008
chrY	14691791	14693512
chrY	14694006	14694675
chrY	14695096	14695436
chrY	14695496	14695773
chrY	14695986	14696347
chrY	14696376	14696748
chrY	14696926	14698289
chrY	14698411	14700155
chrY	14700211	14700569
chrY	14700981	14703050
chrY	14703121	14703648
chrY	14704281	14704557
chrY	14704611	14711332
chrY	14711426	14711809
chrY	14712221	14714786
chrY	14714791	14718492
chrY	14718526	14719264
chrY	14719291	14720922
chrY	14720936	14721415
chrY	14722131	14722506
chrY	14722586	14723928
chrY	14723956	14724626
chrY	14725041	14725312
chrY	14726471	14726749
chrY	14727346	14728714
chrY	14728806	14730174
chrY	14730306	14734987
chrY	14735096	14736011
chrY	14740821	14741122
chrY	14741506	14742732
chrY	14743196	14743468
chrY	14743576	14744975
chrY	14745051	14745496
chrY	14745601	14746007
chrY	14746096	14747392
chrY	14747471	14748062
chrY	14748186	14751623
chrY	14751656	14753741
chrY	14753841	14754172
chrY	14754261	14756900
chrY	14757016	14758050
chrY	14758361	14758635
chrY	14758711	14759113
chrY	14759186	14759825
chrY	14760026	14760329
chrY	14760361	14760638
chrY	14760696	14761118
chrY	14761226	14762288
chrY	14762376	14763559
chrY	14763686	14764384
chrY	14764471	14764828
chrY	14765261	14765768
chrY	14765851	14766708
chrY	14766786	14767094
chrY	14767186	14767913
chrY	14768051	14768461
chrY	14768571	14769143
chrY	14769241	14770023
chrY	14770096	14771232
chrY	14771306	14771747
chrY	14771831	14772774
chrY	14772871	14776899
chrY	14776991	14777501
chrY	14777586	14778741
chrY	14778856	14779399
chrY	14779716	14780976
chrY	14781106	14783386
chrY	14783451	14784793
chrY	14785186	14785635
chrY	14785716	14786483
chrY	14786561	14787825
chrY	14788186	14788906
chrY	14788991	14789416
chrY	14789581	14794449
chrY	14794521	14795158
chrY	14795581	14797139
chrY	14797236	14798593
chrY	14798736	14800815
chrY	14800846	14801919
chrY	14802011	14802743
chrY	14803096	14807205
chrY	14807446	14808899
chrY	14808936	14810975
chrY	14811066	14815105
chrY	14815246	14815524
chrY	14815976	14819153
chrY	14819241	14819776
chrY	14819861	14820947
chrY	14821046	14821726
chrY	14821801	14823629
chrY	14823766	14825070
chrY	14825156	14825927
chrY	14826026	14826511
chrY	14826556	14827309
chrY	14827436	14828641
chrY	14828716	14831824
chrY	14832226	14835378
chrY	14835501	14836339
chrY	14836371	14840947
chrY	14841011	14841475
chrY	14841551	14841998
chrY	14842021	14842502
chrY	14842546	14844387
chrY	14844641	14844935
chrY	14845016	14845322
chrY	14845636	14846815
chrY	14846921	14848994
chrY	14849061	14850560
chrY	14850661	14852996
chrY	14853051	14855292
chrY	14855386	14858772
chrY	14858876	14859905
chrY	14860001	14863015
chrY	14863131	14866151
chrY	14866226	14867183
chrY	14867286	14869503
chrY	14869606	14871443
chrY	14871531	14873010
chrY	14873076	14875698
chrY	14875776	14879880
chrY	14879976	14880345
chrY	14880446	14881810
chrY	14881901	14882175
chrY	14882251	14884504
chrY	14884626	14886226
chrY	14886316	14887887
chrY	14888266	14894078
chrY	14894156	14900728
chrY	14900841	14901350
chrY	14901481	14904020
chrY	14904116	14908277
chrY	14908391	14910897
chrY	14910971	14914759
chrY	14914876	14916764
chrY	14916801	14919373
chrY	14919488	14923814
chrY	14923888	14925864
chrY	14925988	14926289
chrY	14926393	14927251
chrY	14927348	14927647
chrY	14927688	14929030
chrY	14929103	14930920
chrY	14930988	14931879
chrY	14931993	14933661
chrY	14933788	14934409
chrY	14934543	14934882
chrY	14934988	14936956
chrY	14937028	14937931
chrY	14938053	14938320
chrY	14938448	14939708
chrY	14939793	14943519
chrY	14943578	14947577
chrY	14947593	14948732
chrY	14949048	14950496
chrY	14950633	14957704
chrY	14957793	14959505
chrY	14965193	14966440
chrY	14966518	14967277
chrY	14967323	14969119
chrY	14969218	14970353
chrY	14970438	14970775
chrY	14970828	14975927
chrY	14975933	14977373
chrY	14977483	14980916
chrY	14981038	14981609
chrY	14982113	14983838
chrY	14983908	14984457
chrY	14984558	14985067
chrY	14985153	14986247
chrY	14986823	14988752
chrY	14989143	14990106
chrY	14991398	14992756
chrY	14992903	14993176
chrY	14993328	14994229
chrY	14994313	14995628
chrY	14995703	14998629
chrY	14998663	14999871
chrY	15000018	15000403
chrY	15000493	15001343
chrY	15001488	15002138
chrY	15002188	15003096
chrY	15003218	15003615
chrY	15003678	15011120
chrY	15011238	15011850
chrY	15011923	15012404
chrY	15012793	15020660
chrY	15020778	15022926
chrY	15023003	15025211
chrY	15025288	15029578
chrY	15029663	15041018
chrY	15041118	15044091
chrY	15044313	15044627
chrY	15044983	15045256
chrY	15045408	15047450
chrY	15047948	15049414
chrY	15049463	15049762
chrY	15050138	15051234
chrY	15051308	15051682
chrY	15051768	15054996
chrY	15055048	15057230
chrY	15057293	15058927
chrY	15058983	15059794
chrY	15059883	15060388
chrY	15060868	15061799
chrY	15062028	15065808
chrY	15065893	15070267
chrY	15070533	15073151
chrY	15073268	15074901
chrY	15074918	15080874
chrY	15080983	15081758
chrY	15081828	15083495
chrY	15083873	15084281
chrY	15084413	15087357
chrY	15087433	15092280
chrY	15092708	15093487
chrY	15093528	15097911
chrY	15100303	15100572
chrY	15103803	15104745
chrY	15104818	15111321
chrY	15111393	15115370
chrY	15115793	15116534
chrY	15122223	15124037
chrY	15124113	15127140
chrY	15127193	15127621
chrY	15128213	15131632
chrY	15131633	15131906
chrY	15132133	15136051
chrY	15136143	15138094
chrY	15138233	15140761
chrY	15143663	15145108
chrY	15145138	15145776
chrY	15145858	15146335
chrY	15146498	15146772
chrY	15150998	15151296
chrY	15151428	15157700
chrY	15157773	15163388
chrY	15163488	15168030
chrY	15169268	15170030
chrY	15170393	15170671
chrY	15170853	15171317
chrY	15171748	15173563
chrY	15173708	15176137
chrY	15176193	15177637
chrY	15177668	15178259
chrY	15178388	15178672
chrY	15178933	15179817
chrY	15179893	15181549
chrY	15181728	15182820
chrY	15182928	15183653
chrY	15183813	15184170
chrY	15184748	15185021
chrY	15185998	15186358
chrY	15189718	15190149
chrY	15190233	15193400
chrY	15193768	15198583
chrY	15198648	15201689
chrY	15201753	15202413
chrY	15202523	15205955
chrY	15206093	15208127
chrY	15208213	15208663
chrY	15208763	15212737
chrY	15252873	15253619
chrY	15253668	15258490
chrY	15258578	15259109
chrY	15259388	15260050
chrY	15260133	15260787
chrY	15260878	15262421
chrY	15262453	15264164
chrY	15264233	15265345
chrY	15265418	15269484
chrY	15269563	15270849
chrY	15270968	15271382
chrY	15271458	15276297
chrY	15276383	15276781
chrY	15276798	15284096
chrY	15302868	15303655
chrY	15303728	15305659
chrY	15305798	15310436
chrY	15310508	15310940
chrY	15311048	15312442
chrY	15312478	15313686
chrY	15313773	15315295
chrY	15315383	15318077
chrY	15318158	15320497
chrY	15320838	15321357
chrY	15321403	15322493
chrY	15322568	15323548
chrY	15323693	15324029
chrY	15324348	15324824
chrY	15324923	15325224
chrY	15325283	15326644
chrY	15326728	15329550
chrY	15329608	15332100
chrY	15332373	15332824
chrY	15332848	15333294
chrY	15333833	15334133
chrY	15334338	15335832
chrY	15335948	15336535
chrY	15336618	15340467
chrY	15340578	15342491
chrY	15342573	15352713
chrY	15352878	15353787
chrY	15353873	15354966
chrY	15355073	15355806
chrY	15355898	15357950
chrY	15358018	15358566
chrY	15358678	15359399
chrY	15359503	15362010
chrY	15362078	15363865
chrY	15363978	15364527
chrY	15364743	15365367
chrY	15365423	15365992
chrY	15366073	15366692
chrY	15366798	15368673
chrY	15368883	15369186
chrY	15369338	15369790
chrY	15369893	15370192
chrY	15370333	15370989
chrY	15371083	15374523
chrY	15374623	15376118
chrY	15376158	15376428
chrY	15378128	15378510
chrY	15378638	15379229
chrY	15379378	15379651
chrY	15380403	15380703
chrY	15380753	15382786
chrY	15382873	15386200
chrY	15386608	15387930
chrY	15388068	15388410
chrY	15388518	15391239
chrY	15391308	15392071
chrY	15392168	15392508
chrY	15392568	15394310
chrY	15394348	15396155
chrY	15396158	15396428
chrY	15396923	15401252
chrY	15401348	15402499
chrY	15402948	15403650
chrY	15403678	15404158
chrY	15404273	15405269
chrY	15405383	15406727
chrY	15406883	15410429
chrY	15410558	15411272
chrY	15411403	15412272
chrY	15412368	15412871
chrY	15412958	15419942
chrY	15420043	15420338
chrY	15420413	15421289
chrY	15421393	15421899
chrY	15422018	15422797
chrY	15422878	15423277
chrY	15423388	15424100
chrY	15424673	15426170
chrY	15426183	15427294
chrY	15427408	15428985
chrY	15429063	15429872
chrY	15429993	15430744
chrY	15430773	15434259
chrY	15434353	15435080
chrY	15435198	15439936
chrY	15440038	15444069
chrY	15444248	15444523
chrY	15445508	15446533
chrY	15447133	15449999
chrY	15450423	15459416
chrY	15459513	15462618
chrY	15462723	15464289
chrY	15464343	15466111
chrY	15466258	15468126
chrY	15468223	15468519
chrY	15468593	15469178
chrY	15469333	15472054
chrY	15472098	15474882
chrY	15475153	15476355
chrY	15476388	15477834
chrY	15477953	15480048
chrY	15480383	15482771
chrY	15482803	15486059
chrY	15486153	15489394
chrY	15489508	15490468
chrY	15490858	15491858
chrY	15491878	15493225
chrY	15493288	15495002
chrY	15495373	15496376
chrY	15496423	15496831
chrY	15496913	15497469
chrY	15497613	15498079
chrY	15498168	15498681
chrY	15498768	15499480
chrY	15499583	15507370
chrY	15507463	15507878
chrY	15507978	15513584
chrY	15513658	15515285
chrY	15515383	15523447
chrY	15523538	15529913
chrY	15530378	15532981
chrY	15532988	15533463
chrY	15533583	15536116
chrY	15536473	15542578
chrY	15542673	15546213
chrY	15546218	15556828
chrY	15556948	15557945
chrY	15557993	15562530
chrY	15562613	15564071
chrY	15564128	15565931
chrY	15566038	15566671
chrY	15566733	15570143
chrY	15570953	15572422
chrY	15572498	15573621
chrY	15573703	15574814
chrY	15575298	15576480
chrY	15576918	15578901
chrY	15578968	15579485
chrY	15579568	15579982
chrY	15580058	15580359
chrY	15580468	15581189
chrY	15581273	15583559
chrY	15583618	15584146
chrY	15584193	15584979
chrY	15585093	15585956
chrY	15586038	15587731
chrY	15587798	15593122
chrY	15593188	15595221
chrY	15595848	15596122
chrY	15596168	15596705
chrY	15597928	15598192
chrY	15598608	15598882
chrY	15598903	15599626
chrY	15599778	15600053
chrY	15600083	15604183
chrY	15604273	15605166
chrY	15605378	15606517
chrY	15606943	15607948
chrY	15608183	15611923
chrY	15612488	15616722
chrY	15616803	15620373
chrY	15620613	15622276
chrY	15622683	15623281
chrY	15623353	15626396
chrY	15630188	15630461
chrY	15632003	15635981
chrY	15643733	15644165
chrY	15647628	15648011
chrY	15648018	15648996
chrY	15649013	15652834
chrY	15652898	15653520
chrY	15653748	15657852
chrY	15658183	15660311
chrY	15660383	15660973
chrY	15661053	15663913
chrY	15663993	15665713
chrY	15665833	15666131
chrY	15681928	15682882
chrY	15683048	15683325
chrY	15683543	15684337
chrY	15684368	15685227
chrY	15686303	15686618
chrY	15686753	15687550
chrY	15688433	15696832
chrY	15697023	15699054
chrY	15699168	15699847
chrY	15699963	15700316
chrY	15700473	15702386
chrY	15702403	15711929
chrY	15712003	15717162
chrY	15717293	15717630
chrY	15718058	15730588
chrY	15731463	15732361
chrY	15732453	15733349
chrY	15733823	15735546
chrY	15735848	15739260
chrY	15739438	15739714
chrY	15739928	15741863
chrY	15741963	15742242
chrY	15742343	15743120
chrY	15743143	15746770
chrY	15746783	15748355
chrY	15748483	15748764
chrY	15748793	15749066
chrY	15749368	15750407
chrY	15750513	15753256
chrY	15753368	15754460
chrY	15754563	15756202
chrY	15756458	15758687
chrY	15759733	15760085
chrY	15760188	15760458
chrY	15760563	15760837
chrY	15761253	15761824
chrY	15762213	15762492
chrY	15762668	15763193
chrY	15763203	15764343
chrY	15764358	15769187
chrY	15769553	15777845
chrY	15777943	15778584
chrY	15778663	15788777
chrY	15788818	15791045
chrY	15791103	15793560
chrY	15793563	15793873
chrY	15794308	15794891
chrY	15795403	15795671
chrY	15796128	15796428
chrY	15796498	15796835
chrY	15798358	15799161
chrY	15799358	15801630
chrY	15801818	15803305
chrY	15809093	15811290
chrY	15811433	15815206
chrY	15815283	15816594
chrY	15816653	15818506
chrY	15818583	15818923
chrY	15819023	15821443
chrY	15821543	15823896
chrY	15824038	15828537
chrY	15828618	15831432
chrY	15831518	15832297
chrY	15832398	15833931
chrY	15839873	15841785
chrY	15841853	15842617
chrY	15842728	15843116
chrY	15843193	15843462
chrY	15843558	15844522
chrY	15844583	15845857
chrY	15845938	15850919
chrY	15851008	15852680
chrY	15858508	15859528
chrY	15859573	15860008
chrY	15860143	15862980
chrY	15863083	15866049
chrY	15866290	15869242
chrY	15869250	15870383
chrY	15870765	15871472
chrY	15871785	15873391
chrY	15873550	15874135
chrY	15874235	15876355
chrY	15876450	15878391
chrY	15878500	15881890
chrY	15882000	15882670
chrY	15888490	15888794
chrY	15891225	15891498
chrY	15893975	15894246
chrY	15894730	15897567
chrY	15897705	15898704
chrY	15898775	15903374
chrY	15903450	15903956
chrY	15904075	15905878
chrY	15906005	15906348
chrY	15906440	15909482
chrY	15909575	15912103
chrY	15912235	15914217
chrY	15914355	15917716
chrY	15917825	15918437
chrY	15918470	15918904
chrY	15920785	15921063
chrY	15922230	15922683
chrY	15923100	15923530
chrY	15923660	15928558
chrY	15928620	15930761
chrY	15930915	15931524
chrY	15932305	15936916
chrY	15937155	15940141
chrY	15940245	15943850
chrY	15944060	15944338
chrY	15944500	15950538
chrY	15950595	15952006
chrY	15952045	15952696
chrY	15952895	15956973
chrY	15957055	15957878
chrY	15963810	15964699
chrY	15964760	15967520
chrY	15967710	15969773
chrY	15969890	15971325
chrY	15971780	15972230
chrY	15972235	15974921
chrY	15975010	15975674
chrY	15975810	15985575
chrY	15985875	15986179
chrY	15986410	15986682
chrY	15986760	15994109
chrY	15994215	15995396
chrY	15995435	15997284
chrY	15997380	15998842
chrY	15998885	16000127
chrY	16001020	16001681
chrY	16001750	16002021
chrY	16002180	16002631
chrY	16002900	16003254
chrY	16003325	16003691
chrY	16003715	16004270
chrY	16004440	16007174
chrY	16007215	16009506
chrY	16009765	16010728
chrY	16010830	16011137
chrY	16014920	16021268
chrY	16021305	16021579
chrY	16027205	16034158
chrY	16034250	16034587
chrY	16035165	16035439
chrY	16035545	16038178
chrY	16038275	16040894
chrY	16040985	16045227
chrY	16045350	16048435
chrY	16048575	16050799
chrY	16051030	16052372
chrY	16052520	16055532
chrY	16055680	16056780
chrY	16056900	16059121
chrY	16059200	16061844
chrY	16062030	16063283
chrY	16063500	16063843
chrY	16064735	16065013
chrY	16186875	16192724
chrY	16192825	16193857
chrY	16193940	16202108
chrY	16202125	16205893
chrY	16211030	16214203
chrY	16216880	16218826
chrY	16218945	16223470
chrY	16223565	16229875
chrY	16229995	16233541
chrY	16233565	16235069
chrY	16235180	16236040
chrY	16236170	16241030
chrY	16241340	16241865
chrY	16241890	16244319
chrY	16244365	16244996
chrY	16245065	16245742
chrY	16245785	16248183
chrY	16248230	16253954
chrY	16254025	16259085
chrY	16259205	16261113
chrY	16261195	16265958
chrY	16267420	16277185
chrY	16277290	16282193
chrY	16282315	16288644
chrY	16288750	16292648
chrY	16292763	16293638
chrY	16293723	16298305
chrY	16298433	16302268
chrY	16302348	16305755
chrY	16305878	16309067
chrY	16309548	16311882
chrY	16311978	16312394
chrY	16312473	16313351
chrY	16313368	16315486
chrY	16315573	16317351
chrY	16317493	16317763
chrY	16317918	16318877
chrY	16319813	16320088
chrY	16320373	16320643
chrY	16320698	16321046
chrY	16321183	16321455
chrY	16324143	16336121
chrY	16336668	16337001
chrY	16337028	16342124
chrY	16342618	16344420
chrY	16345118	16345461
chrY	16345508	16353162
chrY	16353423	16354335
chrY	16354438	16354972
chrY	16355083	16355357
chrY	16355413	16355958
chrY	16357298	16362406
chrY	16362448	16363924
chrY	16364053	16366208
chrY	16366278	16369560
chrY	16369648	16370835
chrY	16370918	16375922
chrY	16376008	16378621
chrY	16378643	16379242
chrY	16381748	16382513
chrY	16382548	16382893
chrY	16383033	16383335
chrY	16383493	16383762
chrY	16384258	16384540
chrY	16384838	16388139
chrY	16388198	16394257
chrY	16394268	16394661
chrY	16400073	16406953
chrY	16406998	16409084
chrY	16409138	16410264
chrY	16411123	16414461
chrY	16414543	16418966
chrY	16419048	16421580
chrY	16421953	16422283
chrY	16422398	16422890
chrY	16422918	16424273
[truncated: 2,109 more rows]
