# Supplementary material for: In-solution Y-chromosome capture-enrichment on ancient DNA libraries
Source: BMC Genomics. 2018 Aug 14;19:608. doi: 10.1186/s12864-018-4945-x (PMC6092841; doi:10.1186/s12864-018-4945-x)
Supplement: Supplementary file 4 — Table S1. Summary of sequenced and mapped reads of the complete dataset. Table S2. Mean and standard errors regarding reads from down-sampled libraries. (XLSX 25 kb) [file 12864_2018_4945_MOESM4_ESM.xlsx]

## Sheet: Table_S1
Target	Sample	Library	Library type	Total number of reads	Total number of pairs collapsed into one read	Fraction of PE pairs collapsed into one read	Total number of retained reads	Total number of NTs in retained reads	Average number of NTs in retained reads	NUCLEAR: Total number of hits (prior to PCR duplicate filtering)	NUCLEAR:Fraction of hits that were PCR duplicates	Ratio(reads_nuc,reads_mito)	Mitochondrial: Total number of hits (prior to PCR duplicate filtering)	Mitochondrial:Fraction of hits that were PCR duplicates	Mitochondrial:Total number of hits (excluding any PCR duplicates)	Mitochondrial:Coverage	Mitochondrial:Average number of aligned bases per unique hit	NUCLEAR:Total number of hits (prior to PCR duplicate filtering)	Nuclear:Fraction of hits that were PCR duplicates	NUCLEAR:Total number of hits (excluding any PCR duplicates)	NUCLEAR: Coverage	NUCLEAR:Average number of aligned bases per unique hit	OFF-target:Total number of hits (prior to PCR duplicate filtering)	OFF-target:Fraction of hits that were PCR duplicates	OFF-target:Total number of hits (excluding any PCR duplicates)	OFF-target: Coverage	OFF-target:Average number of aligned bases per unique hit	ON-target:Total number of hits (prior to PCR duplicate filtering)	ON-target:Fraction of hits that were PCR duplicates	ON-target:Total number of hits (excluding any PCR duplicates)	ON-target:Coverage	ON-target:Average number of aligned bases per unique hit
STM1	STM1_Complete	STM1_Shotgun	SE	34342995	NA	NA	34025874	3085504198	90.6811	529582	0.0155641	387.283	1409	0.0432931	1348	7.41174	91.1128	528173	0.0115776	522058	0.0153359	92.1561	371	-0.433962	532	0.000910647	86.4586	1027	0.100292	924	0.00928283	89.0552
STM1	STM1_Complete	STM1_WGC	SE	15045788	NA	NA	14973474	1370220032	91.5098	2259064	0.150871	66.7416	162624	0.840805	25889	145.108	92.8806	2096440	0.175807	1727872	0.0506897	92.0329	3065	-0.30832	4010	0.00688281	86.6945	4732	0.380811	2930	0.0276098	83.5307
STM1	STM1_Complete	STM1_WGC_Y	PE	288121	98691	0.342533	476797	39046509	81.8934	64080	0.134397	41.0659	823	0.0777643	759	4.43685	96.8682	63257	0.507264	31169	0.00107612	108.311	511	0.499022	256	0.000502305	99.1055	20183	0.769955	4643	0.0556883	106.32
STM1	STM1_Complete	STM1_Y	PE	113636	68836	0.605759	156139	12558497	80.4315	33066	0.211773	1423.44	19	0.0526316	18	0.0856315	78.8333	33047	0.22468	25622	0.000771743	94.4918	290	0.12069	255	0.00048609	96.2824	22676	0.285985	16191	0.174028	95.2788
STM2	STM2_Complete	STM2_Shotgun	SE	102387726	NA	NA	101373044	9213789912	90.8899	122039	0.00120386	165.217	852	0.146714	727	3.96572	90.3934	121187	0.00886234	120113	0.00351011	91.6781	117	0	117	0.000200518	86.5641	197	0	197	0.00197351	88.802
STM2	STM2_Complete	STM2_WGC	SE	30030742	NA	NA	29884294	2729653154	91.3407	1017760	0.0340567	21.4603	146535	0.836599	23944	133.911	92.6765	871225	0.410204	513845	0.0150218	91.7118	1955	0.391816	1189	0.00202144	85.8713	1395	0.352688	903	0.00848436	83.2879
STM2	STM2_Complete	STM2_WGC_Y	PE	91888	30664	0.333711	152123	12029485	79.0774	13288	0.0873504	9.87668	497	0.102616	446	2.58343	95.9865	12791	0.655617	4405	0.000148072	105.454	165	0.872727	21	3.8983e-05	93.7619	3756	0.940895	222	0.00255109	101.865
STM2	STM2_Complete	STM2_Y	PE	54424	41920	0.770248	63848	4578934	71.7162	4067	0.0636982	339.818	11	0	11	0.0420614	63.3636	4056	0.0784024	3738	0.000104127	87.3892	24	0.125	21	3.63697e-05	87.4762	2799	0.0921758	2541	0.0253634	88.4817
PI174	PI174_Complete	PI174_Shotgun	PE	10313176	9186869	0.89079	10506505	602323396	57.3286	1227	0.000116785	6.2638	168	0.0297619	163	0.53141	54.0245	1059	0.0358829	1021	2.06959e-05	63.5906	3	0	3	4.19726e-06	70.6667	1	0	1	1.45525e-05	129
PI174	PI174_Complete	PI174_WGC	PE	11117775	10059569	0.904819	10891043	584360173	53.6551	2431	0.000223211	3.26547	580	0.136207	501	1.67811	55.505	1851	0.116153	1636	3.29009e-05	63.0899	3	0	3	4.69222e-06	79	2	0	2	9.02483e-06	40
PI174	PI174_Complete	PI174_WGC_Y	PE	19198241	17225806	0.89726	19462545	1117942403	57.4407	30872	0.00158623	8.76471	1293	0.986852	17	0.0509324	49.6471	29579	0.994963	149	3.77923e-06	79.5705	0	NA	0	0	NA	15047	0.998139	28	0.000277852	87.9643
PI174	PI174_Complete	PI174_Y	PE	176867	159905	0.904097	189635	14296917	75.3918	336	0.00177182	63	1	0	1	0.0041639	69	335	0.81194	63	2.07067e-06	103.111	0	NA	0	0	NA	231	0.926407	17	0.000224831	117.235
PI383	PI383_Complete	PI383_Shotgun	PE	3111963	2800628	0.899955	3280042	218841535	66.7191	781	0.000238107	35.8095	21	0	21	0.0750709	59.2381	760	0.0105263	752	1.53388e-05	63.9894	1	0	1	9.8992e-07	50	2	0	2	1.64703e-05	73
PI383	PI383_Complete	PI383_WGC	PE	11044154	10277710	0.930602	10927537	636773115	58.2723	3235	0.000296041	26	119	0.0252101	116	0.427615	61.0862	3116	0.0320924	3016	5.85826e-05	60.9357	2	0	2	3.26674e-06	82.5	6	0	6	3.47456e-05	51.3333
PI383	PI383_Complete	PI383_WGC_Y	PE	15962030	14569963	0.912789	16120500	948779134	58.8554	56258	0.00348984	34.3333	762	0.988189	9	0.031018	57.1111	55496	0.994432	309	6.87345e-06	69.7832	213	0.99061	2	2.4748e-06	62.5	39966	0.996697	132	0.000985286	66.1667
PI383	PI383_Complete	PI383_Y	PE	125949	107951	0.857101	140149	10964955	78.2378	416	0.00296827	92	1	0	1	0.00428459	71	415	0.778313	92	2.23675e-06	76.2717	0	NA	0	0	NA	282	0.904255	27	0.000211858	69.5556
PI435	PI435_Complete	PI435_Shotgun	PE	5435052	4625646	0.851077	5929726	383194609	64.6227	2023	0.000341162	21.2778	92	0.0217391	90	0.304266	56.0222	1931	0.00828586	1915	3.90068e-05	63.9008	3	0	3	4.27645e-06	72	3	0	3	1.85009e-05	54.6667
PI435	PI435_Complete	PI435_WGC	PE	14085554	12376312	0.878653	14712189	893238126	60.7142	28855	0.0019613	5.26699	4763	0.184548	3884	15.2784	65.1849	24092	0.15088	20457	0.000488481	74.9101	49	0.22449	38	5.03473e-05	66.9211	36	0.194444	29	0.000189296	57.8621
PI435	PI435_Complete	PI435_WGC_Y	PE	11728440	10190909	0.868906	12380606	757371386	61.174	305038	0.0246384	11.6797	11672	0.986892	153	0.59574	64.5229	293366	0.993909	1787	4.72417e-05	82.9345	999	0.991992	8	8.75089e-06	55.25	78643	0.997584	190	0.00165132	77.0421
PI435	PI435_Complete	PI435_Y	PE	48656	41845	0.860017	54261	4333728	79.8682	339	0.00624758	NA	0	NA	0	0	NA	339	0.846608	52	1.4561e-06	87.8462	1	0	1	1.46508e-06	74	264	0.905303	25	0.00021637	76.72
PI437	PI437_Complete	PI437_Shotgun	PE	12552639	10000957	0.796721	13837819	874816972	63.2193	2561	0.000185073	11.9119	198	0.0252525	193	0.607145	52.1295	2363	0.0270842	2299	5.06365e-05	69.097	4	0	4	7.32541e-06	92.5	2	0	2	1.16195e-05	51.5
PI437	PI437_Complete	PI437_WGC	PE	11114899	9138985	0.822228	11627136	685934805	58.9943	3951	0.000339809	5.60329	610	0.103279	547	1.94804	59.0146	3341	0.08261	3065	6.89401e-05	70.5628	3	0	3	4.05867e-06	68.3333	4	0	4	3.33919e-05	74
PI437	PI437_Complete	PI437_WGC_Y	PE	14244023	11365394	0.797906	15313878	917032616	59.8825	47416	0.00309628	13.1667	1416	0.987288	18	0.0659586	60.7222	46000	0.994848	237	6.00482e-06	79.4852	1118	0.999106	1	1.82145e-06	92	17878	0.998098	34	0.000273904	71.4118
PI437	PI437_Complete	PI437_Y	PE	65507	56208	0.858046	72367	5818561	80.4035	242	0.00334407	55	1	0	1	0.00301732	50	241	0.771784	55	1.58998e-06	90.6909	0	NA	0	0	NA	104	0.884615	12	0.000105816	78.1667

## Sheet: Table_S2
Target	Sample	Library	lib_type	Mean_ON	meanerror_ON	Mean_OFF	meanerror_OFF	Mean_Length_nuclear	meanerror_Length_nuclear	Mean_Coverage_nuclear	meanerror_Coverage_nuclear	Mean_Coverage_ON	meanerror_Coverage_ON	Mean_Coverage_OFF	meanerror_Coverage_OFF	Mean_Clonality	meanerror_Clonality	Mean_Clonality_ON	meanerror_Clonality_ON	Mean_Clonality_OFF	meanerror_Clonality_OFF	Mean_Hits_unique_nuclear	meanerror_Hits_unique_nuclear	Endogenous	seq_retained_reads
PI174	PI174_Shotgun	PI174_Shotgun_downsampled	PE	0	0	0	0	62.5026	2.35335	3.83693e-07	0	0	0	0	0	0	0	0	NA	0	NA	19.4	3.64701	0.000121456	159728
PI174	PI174_WGC	PI174_WGC_downsampled	PE	0.1	0.181246	0.1	0.181246	61.7493	2.67271	5.18688e-07	0	3.83555e-07	0	1.32649e-07	0	0.00454545	0	0	NA	0	0	26.5	2.98736	0.000121456	159728
PI174	PI174_WGC_Y	PI174_WGC_Y_downsampled	PE	17.1	0.737464	0	0	79.6932	0.76894	2.0226e-06	0	0.000161071	0	0	0	0.707836	0.0579598	0.877781	0.0448921	0	NA	79.6	2.70456	0.000121456	159728
PI174	PI174_Y	PI174_Y_downsampled	PE	17	0	0	0	103.111	0	2.07067e-06	0	0.000224831	0	0	0	0.81194	0	0.926407	0	0	NA	63	0	0.000121456	159728
PI383	PI383_Shotgun	PI383_Shotgun_downsampled	PE	0	0	0.2	0.241661	62.6444	3.55694	5.52573e-07	0	0	0	1.97984e-07	0	0.00344828	0	0	NA	0	NA	27.6	2.59435	0.000256039	107796
PI383	PI383_WGC	PI383_WGC_downsampled	PE	0.1	0.181246	0	0	62.0635	2.01924	6.3969e-07	0	6.31738e-07	0	0	0	0	0	0	NA	0	NA	32.3	2.19583	0.000256039	107796
PI383	PI383_WGC_Y	PI383_WGC_Y_downsampled	PE	81.3	2.74275	1.2	0.362492	69.0156	0.536886	3.46758e-06	0	0.000603468	0	1.41559e-06	0	0.62171	0.0564325	0.725771	0.0585528	0.143333	0.227083	157.6	4.14363	0.000256039	107796
PI383	PI383_Y	PI383_Y_downsampled	PE	27	0	0	0	76.2717	0	2.23675e-06	0	0.000211858	0	0	0	0.778313	0	0.904255	0	0	NA	92	0	0.000256039	107796
PI435	PI435_Shotgun	PI435_Shotgun_downsampled	PE	0.1	0.181246	0	0	64.7718	3.26649	3.49554e-07	0	8.57359e-07	0	0	0	0	0	0	NA	0	NA	16.9	2.25164	0.00040421	41810
PI435	PI435_WGC	PI435_WGC_downsampled	PE	0	0	0.2	0.241661	73.487	1.64276	1.88417e-06	0	0	0	3.28653e-07	0	0	0	0	NA	0	NA	80.4	7.34587	0.00040421	41810
PI435	PI435_WGC_Y	PI435_WGC_Y_downsampled	PE	109.7	2.8085	3	0.854402	84.4458	0.35014	1.69737e-05	0	0.000962386	0	3.26872e-06	0	0.4742	0.0242096	0.65436	0.0490646	0.20119	0.256775	630.6	11.2775	0.00040421	41810
PI435	PI435_Y	PI435_Y_downsampled	PE	25	0	1	0	87.8462	0	1.4561e-06	0	0.00021637	0	1.46508e-06	0	0.846608	0	0.905303	0	0	0	52	0	0.00040421	41810
PI437	PI437_Shotgun	PI437_Shotgun_downsampled	PE	0	0	0	0	67.5265	3.68919	2.53798e-07	0	0	0	0	0	0	0	0	NA	0	NA	11.9	1.46624	0.000211906	56157
PI437	PI437_WGC	PI437_WGC_downsampled	PE	0	0	0	0	72.3035	2.01037	4.9408e-07	0	0	0	0	0	0	0	0	NA	0	NA	21.4	2.50851	0.000211906	56157
PI437	PI437_WGC_Y	PI437_WGC_Y_downsampled	PE	24.5	1.01993	1	0	79.9359	1.04272	2.45223e-06	0	0.000200239	0	1.82145e-06	0	0.595283	0.0667735	0.74975	0.08082	0.847976	0.138503	96.3	4.19485	0.000211906	56157
PI437	PI437_Y	PI437_Y_downsampled	PE	12	0	0	0	90.6909	0	1.58998e-06	0	0.000105816	0	0	0	0.771784	0	0.884615	0	0	NA	55	0	0.000211906	56157
STM1	STM1_Shotgun	STM1_Shotgun_downsampled	SE	2.3	0.543738	0.8	0.452107	92.2314	0.113588	3.11547e-05	0	2.2156e-05	0	1.14633e-06	0	9.44287e-05	0	0	0	0	NA	1059.7	19.6866	0.0154037	68795
STM1	STM1_WGC	STM1_WGC_downsampled	SE	16.8	1.03943	25.2	3.479	91.9848	0.0262895	0.00028134	0	0.000158273	0	4.31605e-05	0	0.00204801	0	0	0	0	0	9595.1	47.7354	0.0154037	68795
STM1	STM1_WGC_Y	STM1_WGC_Y_downsampled	PE	4239.5	10.2963	210.2	2.03628	108.679	0.0331436	0.000855151	0	0.0511296	0.00011267	0.000417447	0	0.441223	0.00169585	0.699644	0.00436509	0.493723	0.0240562	24685	14.3402	0.0154037	68795
STM1	STM1_Y	STM1_Y_downsampled	PE	16191	0	255	0	94.4918	0	0.000771743	0	0.174028	0	0.00048609	0	0.22468	0	0.285985	0	0.155629	0	25622	0	0.0154037	68795
STM2	STM2_Shotgun	STM2_Shotgun_downsampled	SE	0.2	0.241661	0.1	0.181246	92.0505	0.799992	1.08363e-06	0	2.12084e-06	0	1.86105e-07	0	0	0	0	NA	0	NA	36.9	3.40102	0.00120474	30629
STM2	STM2_WGC	STM2_WGC_downsampled	SE	1.5	0.675464	1.7	0.664569	91.5961	0.157097	2.59271e-05	0	1.32327e-05	0	2.65101e-06	0	0.000442405	0	0	NA	0	NA	888	14.4997	0.00120474	30629
STM2	STM2_WGC_Y	STM2_WGC_Y_downsampled	PE	222	0	21	0	105.454	0	0.000148072	0	0.00255109	0	3.8983e-05	0	0.655617	0	0.940895	0	0.872727	0	4405	0	0.00120474	30629
STM2	STM2_Y	STM2_Y_downsampled	PE	1909.8	11.6675	15.6	1.40912	87.5023	0.134549	7.8026e-05	0	0.019094	6.6535e-05	2.70327e-05	0	0.0600066	0.00194193	0.0701066	0.00351021	0.0892601	0.0424883	2797.4	14.236	0.00120474	30629
